# Supplementary material
Source: Preprints.org preprint supplement (doi:10.20944/preprints202007.0263.v1)
Supplement: Supplementary file 4 [file supplementary]

A

Gene Feature eFP Corepression Treatment SRA Project gPCR Primer BLAST

### eFP for BnaA01g270900

gFP Map gFP Chart **eFP Table**

| Sample                                                | Origin | Tissue           | Stage       | Condition  | FPKM   |
|-------------------------------------------------------|--------|------------------|-------------|------------|--------|
| Germminating_seed_Seeds.germination_Greenhouse_12_HAG | seed   | germinating seed | germination | greenhouse | 25.400 |
| Cotyledons_Seeds.germination_Greenhouse_70_HAG        | leaf   | cotyledon        | germination | greenhouse | 28.101 |
| Germminating_seed_Seeds.germination_Greenhouse_38_HAG | seed   | germinating seed | germination | greenhouse | 28.523 |
| Hypocotyls_Seeds.germination_Greenhouse_34_HAG        | leaf   | hypocotyls       | germination | greenhouse | 28.525 |
| Radicle_Seeds.germination_Greenhouse_34_HAG           | root   | radicle          | germination | greenhouse | 58.988 |
| Cotyledons_Seeds.germination_Greenhouse_48_HAG        | leaf   | cotyledon        | germination | greenhouse | 55.888 |
| Hypocotyls_Seeds.germination_Greenhouse_48_HAG        | leaf   | hypocotyls       | germination | greenhouse | 42.430 |
| Radicle_Seeds.germination_Greenhouse_48_HAG           | root   | radicle          | germination | greenhouse | 21.900 |
| Cotyledons_Seeds.germination_Greenhouse_72_HAG        | leaf   | cotyledon        | germination | greenhouse | 48.018 |
| Hypocotyls_Seeds.germination_Greenhouse_72_HAG        | leaf   | hypocotyls       | germination | greenhouse | 41.071 |

1 2 3 4 5 ... 11 > 10 / page

Export To Excel

B

### BnaA01g270900 Expressions Under Treatments

Biotic Abiotic Chemical

Table Chart

| SRA Accession | Sample Accession | FPKM   | TPM    | Reads Count | Sample Name     | Cultivar | Organ | Tissue    | Stage     | Condition | Treatment Type | Treatment Group | Treatment Reagent        |
|---------------|------------------|--------|--------|-------------|-----------------|----------|-------|-----------|-----------|-----------|----------------|-----------------|--------------------------|
| PRJNA274853   | SRR1793957       | 22.668 | 26.977 | 3           | susceptibility  | J602     | Stem  | stem      | flowering | field     | biotic         | test            | Sclerotinia sclerotiorum |
| PRJNA274853   | SRR1793958       | 36.100 | 52.791 | 4           | susceptibility  | J602     | Stem  | stem      | flowering | field     | biotic         | control         | N                        |
| PRJNA274853   | SRR1793959       | 28.113 | 50.849 | 15          | susceptibility  | J602     | Stem  | stem      | flowering | field     | biotic         | control         | N                        |
| PRJNA274853   | SRR1793960       | 27.119 | 48.684 | 18          | susceptibility  | J602     | Stem  | stem      | flowering | field     | biotic         | control         | N                        |
| PRJNA274853   | SRR1793963       | 26.599 | 54.013 | 12          | resistance      | J664     | Stem  | stem      | flowering | field     | biotic         | test            | Sclerotinia sclerotiorum |
| PRJNA230825   | SRR1151470       | 18.913 | 2.014  | 6           | vestar-Lmo-7dca | Westar   | Leaf  | cotyledon | seedling  | NA        | biotic         | test            | Erpophthora maculans     |

1 2 3 4 5 ... 18 > 10 / page

Export To Excel

C

### Browse Genes of Brassica napus L.

| Gene ID       | Gene           | Start   | End     | Strand | Length | Gene Note                                                |
|---------------|----------------|---------|---------|--------|--------|----------------------------------------------------------|
| BnaA21g000500 | chr401         | 5435    | 2985    | -      | 2791   | protein SCA-like                                         |
| BnaA21g114400 | chr401         | 5621758 | 5621209 | +      | 510    | guanine oxidoreductase PG2-like (HbPm X2)                |
| BnaA21g115960 | chr401         | 5857856 | 5856795 | -      | 3882   | 2nd finger NHR23 domain-containing protein 15-like       |
| BnaA21g117400 | chr401         | 5859447 | 5856592 | -      | 2756   | proteinaceous RNase P 2-like isoform X1                  |
| BnaA21g144900 | chr1021_random | 8486    | 3489    | -      | 2622   | protophylla-chloroplast-180                              |
| BnaA22g543401 | chr402_random  | 7428    | 3409    | +      | 3350   | R1-like effector response 5-like                         |
| BnaA22g119400 | chr1021_random | 1607021 | 1602289 | -      | 5233   | systemic-rich repeat secretory protein 12-like           |
| BnaA22g171700 | chr1021_random | 1617218 | 1615041 | -      | 2178   | systemic-rich repeat secretory protein 13-like           |
| BnaA23g075000 | chr1021_random | 1954302 | 1979712 | -      | 5619   | RNA polymerase II-associated protein 2-like isoform X1   |
| BnaA24g070100 | chr1021_random | 9971    | 4245    | +      | 1929   | L-type lectin domain-containing receptor kinase V 5-like |

1 2 3 4 5 ... 10101 > 10 / page
