# Supplementary material
Source: Preprints.org preprint supplement (doi:10.20944/preprints202007.0263.v1)

eFP for *BnaA01g27090D*

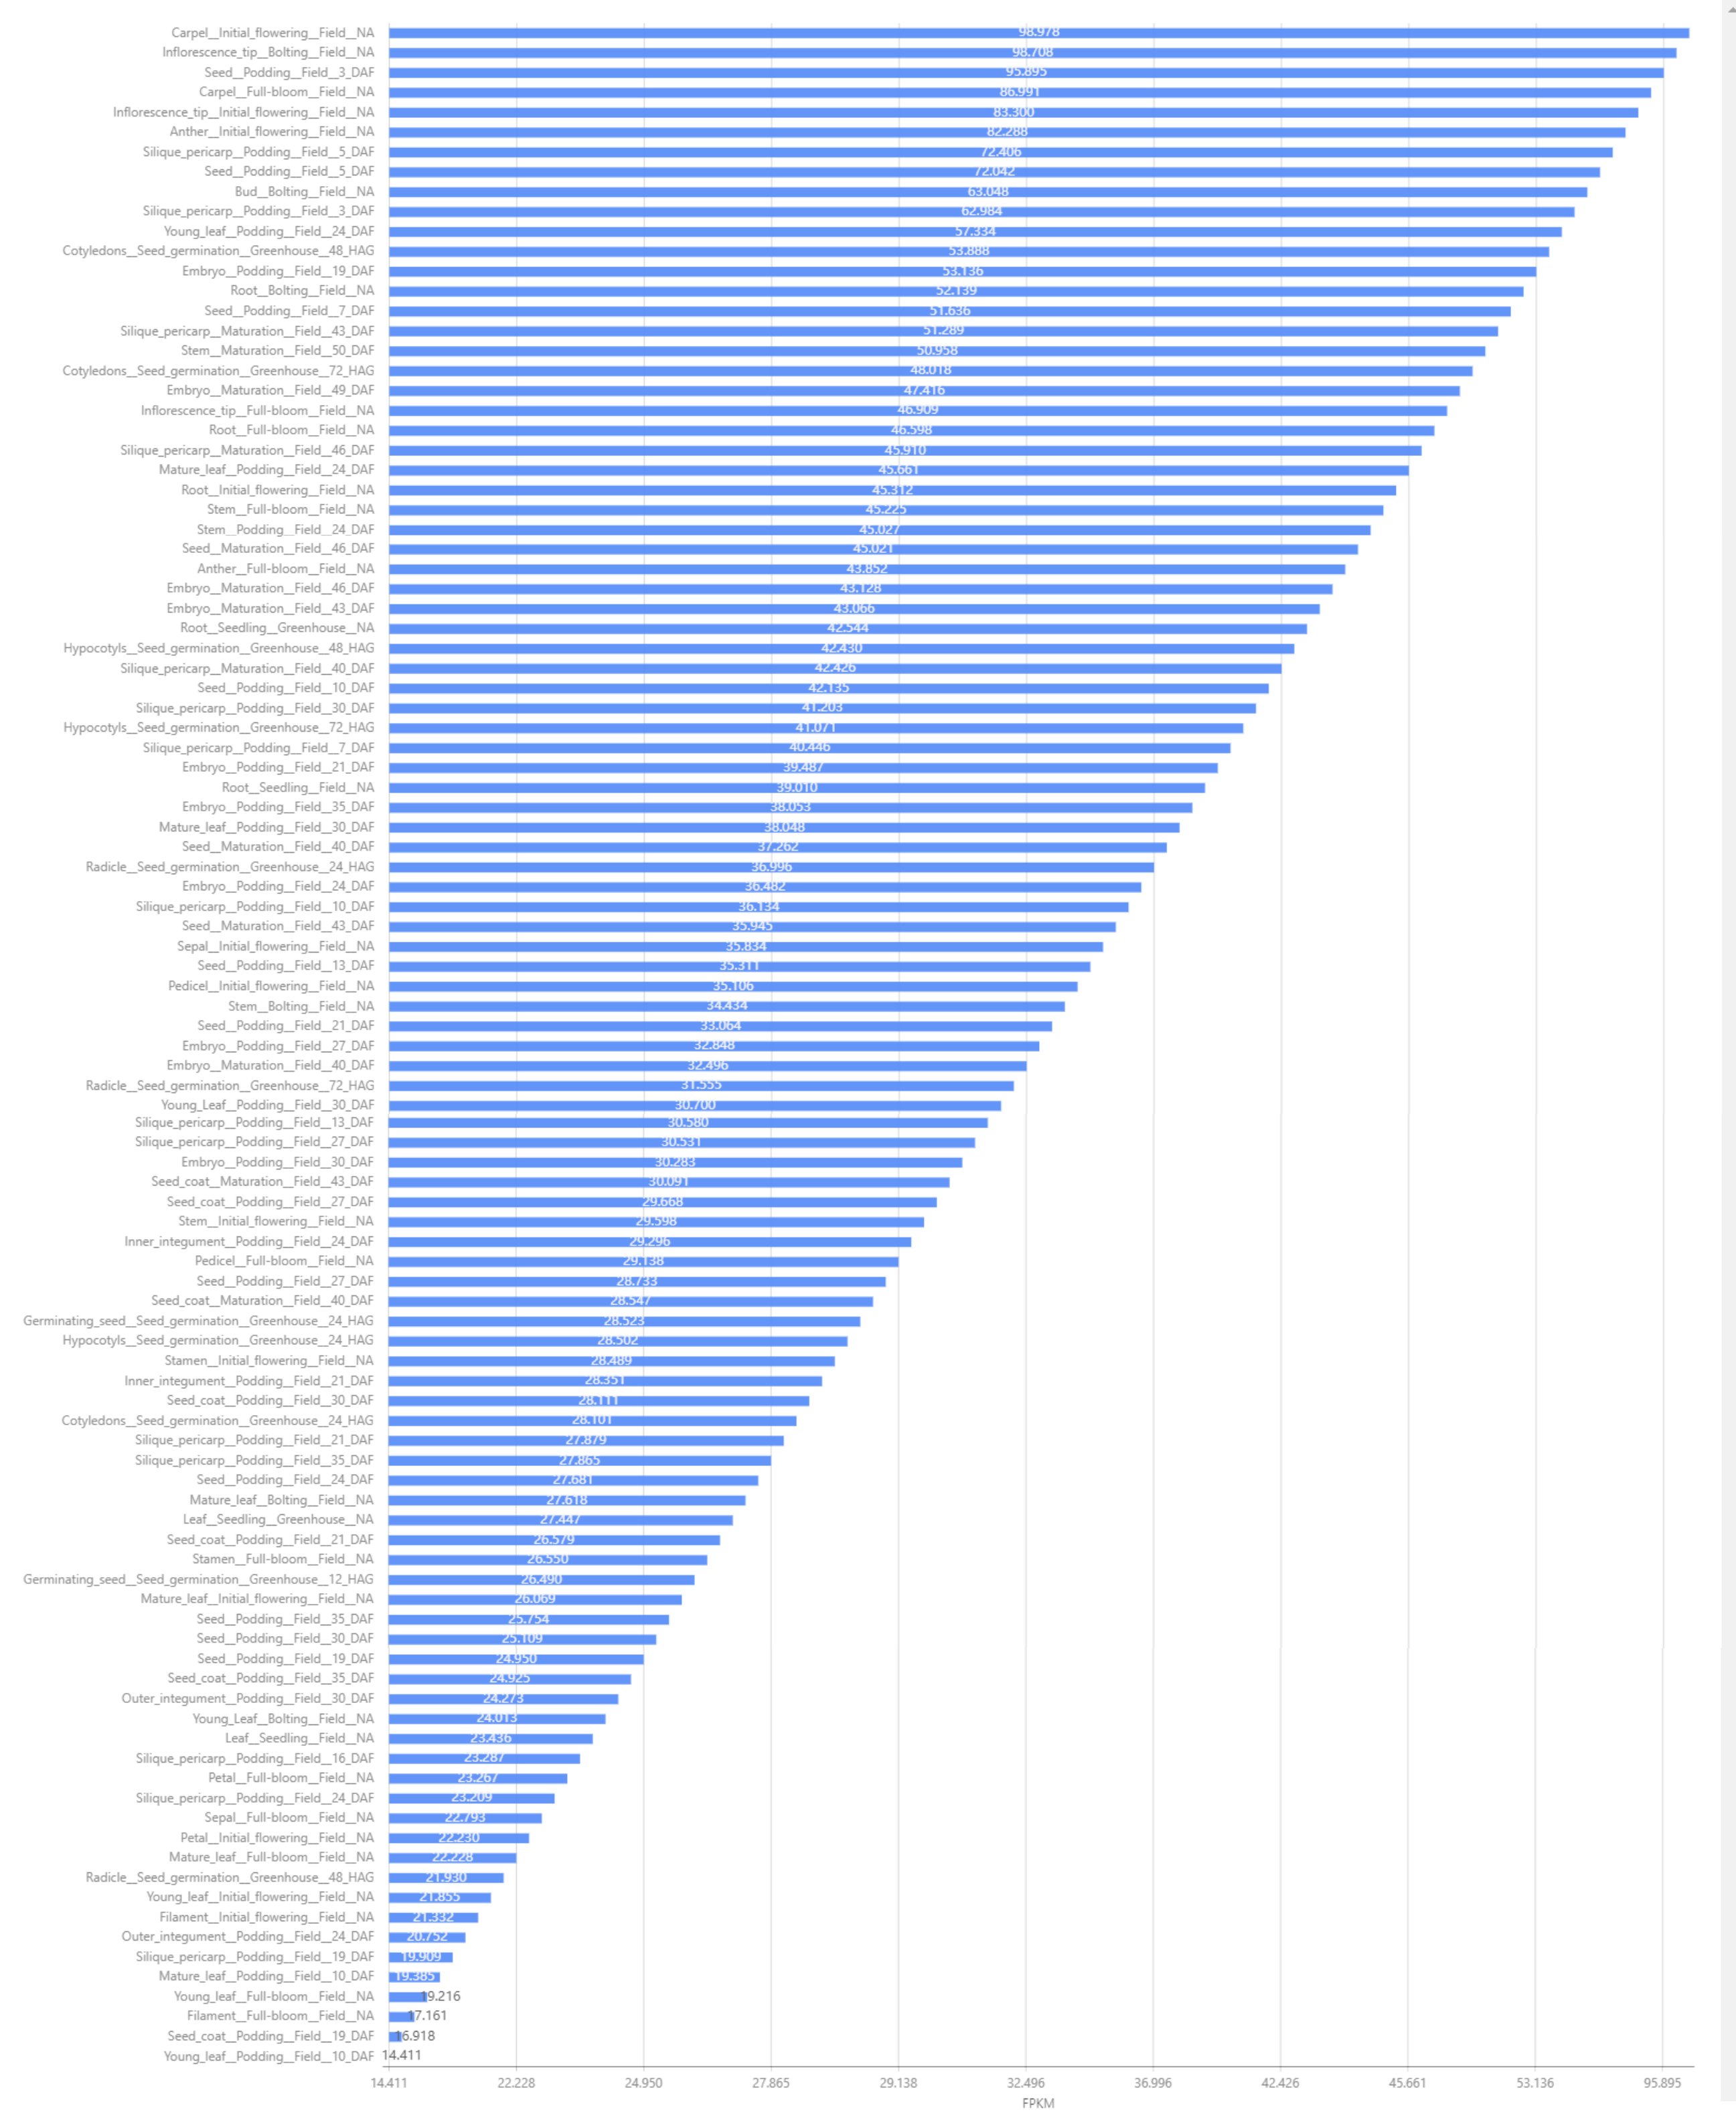

Supplement: Supplementary file 1 [file supplementary]

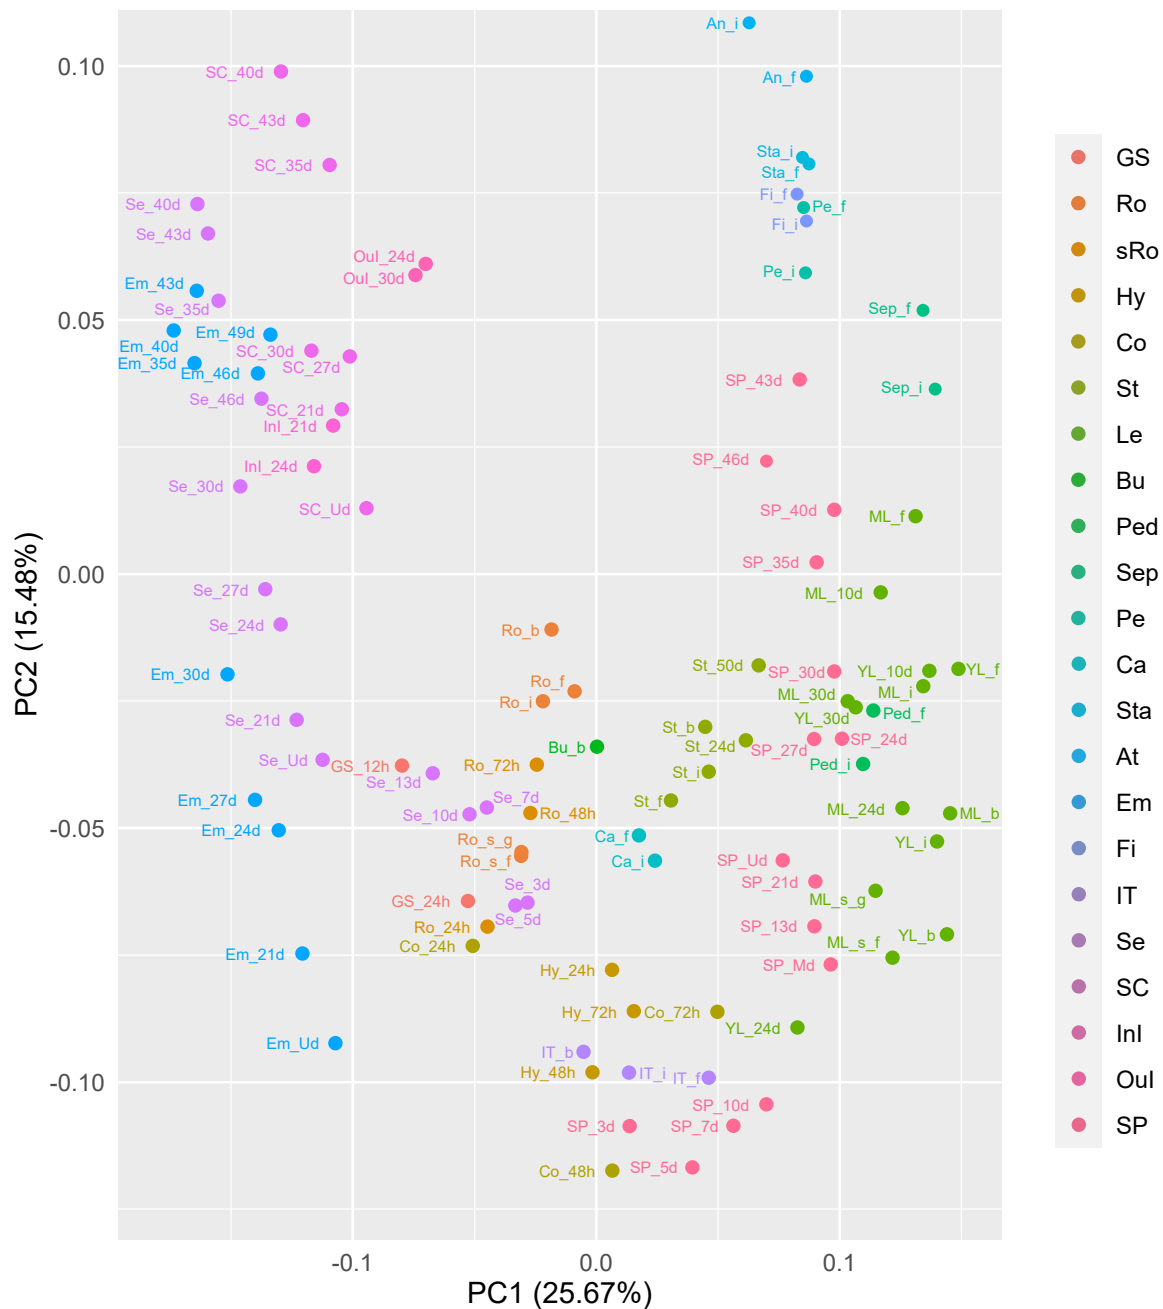

Supplement: Supplementary file 3 [file supplementary]
